# Supplementary material for: Comparative and clinical impact of targeted next-generation sequencing in pediatric pneumonia diagnosis and treatment
Source: Front Microbiol. 2025 Jun 25;16:1590792. doi: 10.3389/fmicb.2025.1590792 (PMC12238002; doi:10.3389/fmicb.2025.1590792)
Supplement: Supplementary file 2 [file Table_1.xlsx]

## Sheet: Sheet1
Supplementary Table 1. The Comparison of Pathogens Diagnostic Performance of tNGS and CMTs
Pathogen Species						CMTs
	Sensitivity%(95%CI)	Specificity%(95%CI)	PPV%(95%CI)	NPV%(95%CI)	Accuracy%(95%CI)	Sensitivity%(95%CI)	Specificity%(95%CI)	PPV%(95%CI)	NPV%(95%CI)	Accuracy%(95%CI)
Atypical bacteria	74.4(65.56-83.33)	98.1(94.44-100)	74.4(65.56-83.33)	95.6(91.11-98.89)	93.6(87.78-97.78)	50(40.00-60.00)	98.1(94.44-100)	50(40.00-60.00)	89.2(82.22-95.56)	87.2(80.00-93.33)
Mycoplasma pneumoniae	77.1 (71.4-82.9)	95.6 (92.8-98.4)	90.0 (85.9-94.1)	89.0 (84.8-93.3)	89.3 (85.1-93.5)	55.7 (48.9-62.5)	96.3 (93.8-98.9)	88.6 (84.3-93.0)	80.9 (75.5-86.2)	82.5 (77.3-87.7)
Bordetella pertussis	100.0 (100.0-100)	99.5 (98.6-100)	75.0 (69.1-80.9)	100.0 (100.0-100)	99.5 (98.6-100)	NA	NA	NA	NA	NA
Chlamydia pneumoniae	100.0 (100.0-100)	100.0 (100.0-100)	100.0 (100.0-100)	100.0 (100.0-100)	100.0 (100.0-100)	100.0 (100.0-100)	99.5 (98.6-100)	50.0 (43.2-56.8)	100.0 (100.0-100)	99.5 (98.6-100)
Chlamydia trachomatis	100.0 (100.0-100)	100.0 (100.0-100)	100.0 (100.0-100)	100.0 (100.0-100)	100.0 (100.0-100)	50.0 (43.2-56.8)	99.5 (98.5-100)	83.3 (78.2-88.4)	97.5 (95.4-99.6)	97.1 (94.8-99.4)
Legionella pneumophila	NA	NA	NA	NA	NA	100.0 (100.0-100)	100.0 (100.0-100)	100.0 (100.0-100)	100.0 (100.0-100)	100.0 (100.0-100)
Bacteria	60.1(52.35-67.79)	93.5(89.26-97.32)	50.4(42.28-58.39)	97.8(95.3-100.00)	91.9(87.25-95.97)	34.3(27.59-41.38)	94.1(90.23-97.13)	35.8(28.74-43.1)	95.7(92.53-98.28)	90.5(85.63-94.83)
Haemophilus influenzae	85.1 (80.2-90.0)	96.2 (93.6-98.8)	87.0 (82.4-91.6)	95.6 (92.8-98.4)	93.7 (90.4-97.0)	51.1 (44.2-57.9)	99.4 (98.3-100)	96.0 (93.3-98.7)	87.3 (82.7-91.8)	88.3 (84.0-92.7)
Moraxella catarrhalis	89.5 (85.3-93.7)	98.4 (96.7-100)	85.0 (80.1-89.9)	98.9 (97.5-100)	97.6 (95.5-99.7)	52.6 (45.8-59.4)	98.9 (97.5-100)	83.3 (78.2-88.4)	95.4 (92.5-98.2)	94.7 (91.6-97.7)
Staphylococcus aureus	66.7 (60.2-73.1)	95.9 (93.2-98.6)	42.9 (36.1-49.6)	98.4 (96.7-100)	94.7 (91.6-97.7)	66.7 (60.2-73.1)	97.0 (94.6-99.3)	50.0 (43.2-56.8)	98.5 (96.8-100)	95.6 (92.8-98.4)
Streptococcus pneumoniae	82.9 (77.8-88.1)	96.4 (93.8-98.9)	85.0 (80.1-89.9)	95.8 (93.0-98.5)	93.7 (90.4-97.0)	53.7 (46.8-60.5)	100.0 (100.0-100)	100.0 (100.0-100)	89.7 (85.5-93.8)	90.8 (86.8-94.7)
Acinetobacter baumannii	100.0 (100.0-100)	97.5 (95.4-99.7)	37.5 (30.9-44.1)	100.0 (100.0-100)	97.6 (95.5-99.7)	33.3 (26.9-39.8)	100.0 (100.0-100)	100.0 (100.0-100)	99.0 (97.7-100)	99.0 (97.7-100)
Escherichia coli	33.3 (26.9-39.8)	99.0 (97.7-100)	33.3 (26.9-39.8)	99.0 (97.7-100)	98.1 (96.2-99.9)	66.7 (60.2-73.1)	99.5 (98.6-100)	66.7 (60.2-73.1)	99.5 (98.6-100)	99.0 (97.7-100)
Klebsiella pneumoniae	100.0 (100.0-100)	98.0 (96.1-99.9)	33.3 (26.9-39.8)	100.0 (100.0-100)	98.1 (96.2-99.9)	100.0 (100.0-100)	99.0 (97.7-100)	50.0 (43.2-56.8)	100.0 (100.0-100)	99.0 (97.7-100)
Mycobacterium tuberculosis complex	100.0 (100.0-100)	100.0 (100.0-100)	100.0 (100.0-100)	100.0 (100.0-100)	100.0 (100.0-100)	NA	NA	NA	NA	NA
Pseudomonas aeruginosa	50.0 (43.2-56.8)	100.0 (100.0-100)	100.0 (100.0-100)	99.5 (98.6-100)	99.5 (98.6-100)	50.0 (43.2-56.8)	100.0 (100.0-100)	100.0 (100.0-100)	99.5 (98.6-100)	99.5 (98.6-100)
Viruses	81.3(74.65-87.32)	95.3(91.55-98.59)	69.8(61.97-77.46)	99.7(98.59-100.00)	95.4(91.55-98.59)	18.0(11.48-25.41)	99.5(97.54-100.00)	20.9(13.93-28.69)	92.7(87.7-96.72)	92.3(86.89-96.72)
Cytomegalovirus	90.5 (86.5-94.5)	83.8 (78.8-88.8)	38.8 (32.1-45.4)	98.7 (97.2-100)	84.5 (79.5-89.4)	66.7 (60.2-73.1)	97.8 (95.9-99.8)	77.8 (72.1-83.5)	96.3 (93.7-98.9)	94.7 (91.6-97.7)
Respiratory syncytial virus	97.4 (95.2-99.6)	99.4 (98.4-100)	97.4 (95.2-99.6)	99.4 (98.4-100)	99.0 (97.7-100)	18.4 (13.1-23.7)	100.0 (100.0-100)	100.0 (100.0-100)	84.4 (79.5-89.4)	85.0 (80.1-89.8)
Rhinovirus	100.0 (100.0-100)	94.1 (90.9-97.3)	64.5 (58.0-71.0)	100.0 (100.0-100)	94.7 (91.6-97.7)	10.0 (5.9-14.1)	98.9 (97.5-100)	50.0 (43.2-56.8)	91.1 (87.2-95.0)	90.3 (86.2-94.3)
Adenovirus	100.0 (100.0-100)	97.5 (95.4-99.6)	54.5 (47.7-61.3)	100.0 (100.0-100)	97.6 (95.5-99.7)	NA	NA	NA	NA	NA
Enterovirus D68	100.0 (100.0-100)	99.5 (98.6-100)	75.0 (69.1-80.9)	100.0 (100.0-100)	99.5 (98.6-100)	NA	NA	NA	NA	NA
Enterovirus group B	100.0 (100.0-100)	100.0 (100.0-100)	100.0 (100.0-100)	100.0 (100.0-100)	100.0 (100.0-100)	NA	NA	NA	NA	NA
Epstein-Barr virus	100.0 (100.0-100)	94.1 (90.9-97.3)	14.3 (9.5-19.1)	100.0 (100.0-100)	94.2 (91.0-97.4)	100.0 (100.0-100)	99.5 (98.6-100)	66.7 (60.2-73.1)	100.0 (100.0-100)	99.5 (98.6-100)
Human bocavirus virus type 1	100.0 (100.0-100)	99.0 (97.7-100)	50.0 (43.2-56.8)	100.0 (100.0-100)	99.0 (97.7-100)	NA	NA	NA	NA	NA
Human coronavirus	100.0 (100.0-100)	100.0 (100.0-100)	100.0 (100.0-100)	100.0 (100.0-100)	100.0 (100.0-100)	NA	NA	NA	NA	NA
Human metapneumovirus	100.0 (100.0-100)	99.5 (98.5-100)	95.0 (92.0-98.0)	100.0 (100.0-100)	99.5 (98.6-100)	NA	NA	NA	NA	NA
Human parainfluenza virus	100.0 (100.0-100)	97.9 (95.9-99.9)	80.0 (74.5-85.5)	100.0 (100.0-100)	98.1 (96.2-99.9)	NA	NA	NA	NA	NA
Influenza B virus	50.0 (43.2-56.8)	100.0 (100.0-100)	100.0 (100.0-100)	99.5 (98.6-100)	99.5 (98.6-100)	50.0 (43.2-56.8)	100.0 (100.0-100)	100.0 (100.0-100)	99.5 (98.6-100)	99.5 (98.6-100)
