# Supplementary material for: Comparative and clinical impact of targeted next-generation sequencing in pediatric pneumonia diagnosis and treatment
Source: Front Microbiol. 2025 Jun 25;16:1590792. doi: 10.3389/fmicb.2025.1590792 (PMC12238002; doi:10.3389/fmicb.2025.1590792)
Supplement: Supplementary file 3 [file Table_2.xlsx]

## Sheet: Sheet1
Supplementary Table 2. Detailed information of pathogens detection result by tNGS testing.
Patient ID	Clinical adjudication	Nanopore Results				tNGS		Conventional method
		Pathogen Species	Total microbe reads	Target Pathogen Reads	RA	Comparison to Clinical adjudication	Score	Conventional method	Comparison to Clinical adjudication	Score
1	Respiratory syncytial virus	Respiratory syncytial virus	73126	73126	1	TP	0.5	Respiratory syncytial virus	TP	0.5
	Unidentified bacteria	-		0	0	FN		-	FN
2	Respiratory syncytial virus	Respiratory syncytial virus	59193	57466	0.970824	TP	1	Respiratory syncytial virus	FN	0.5
	Staphylococcus aureus	Staphylococcus aureus		343	0.0057946	TP		Staphylococcus aureus	TP
3	Cytomegalovirus	Cytomegalovirus	66365	135	0.0020342	TP	1	Cytomegalovirus	FN	0
	Chlamydia trachomatis	Chlamydia trachomatis		62265	0.93822	TP		Chlamydia trachomatis	FN
4	Chlamydia trachomatis	Chlamydia trachomatis	59478	59428	0.999159	TP	0.666667	Chlamydia trachomatis	FN	0.333333
	Pseudomonas aeruginosa	Pseudomonas aeruginosa		0	0	FN		Pseudomonas aeruginosa	TP
	Cytomegalovirus	Cytomegalovirus		50	0.000840647	TP		Cytomegalovirus	FN
5	Respiratory syncytial virus	Respiratory syncytial virus	75875	75728	0.00102801	TP	1	Respiratory syncytial virus	FN	0.666667
	Moraxella catarrhalis	Moraxella catarrhalis		78	0.998063	TP		Moraxella catarrhalis	TP
	Klebsiella pneumoniae	Klebsiella pneumoniae		49	0.000645799	TP		Klebsiella pneumoniae	TP
6	Chlamydia trachomatis	Chlamydia trachomatis	51915	50967	0.981739	TP	1	Chlamydia trachomatis	TP	1
	Cytomegalovirus	Cytomegalovirus		948	0.0182606	TP		Cytomegalovirus	TP
7	Respiratory syncytial virus	Respiratory syncytial virus	15711	10363	0.659602	TP	0.666667	Respiratory syncytial virus	FN	0.333333
	Haemophilus influenzae	Haemophilus influenzae		4967	0.316148	TP		Haemophilus influenzae	FN
	Cytomegalovirus	Cytomegalovirus		0	0	FN		Cytomegalovirus	TP
8	Chlamydia trachomatis	Chlamydia trachomatis	27959	5780	0.206731	TP	0.5	Chlamydia trachomatis	FN	0.5
	Parainfluenza virus	Parainfluenza virus		22179	0.793269	TP		Parainfluenza virus	FN
	Moraxella catarrhalis	Moraxella catarrhalis		0	0	FN		Moraxella catarrhalis	TP
	Staphylococcus aureus	Staphylococcus aureus		0	0	FN		Staphylococcus aureus	TP
9	Staphylococcus aureus	Staphylococcus aureus	1667	1667	1	TP	1	Staphylococcus aureus	FN	0
10	Chlamydia trachomatis	Chlamydia trachomatis	42003	37431	0.891151	TP	1	Chlamydia trachomatis	TP	1
	Staphylococcus aureus	Staphylococcus aureus		520	0.0123801	TP		Staphylococcus aureus	TP
	Cytomegalovirus	Cytomegalovirus		1343	0.0319739	TP		Cytomegalovirus	TP
11	Staphylococcus aureus	Staphylococcus aureus	56332	2782	0.0493858	TP	1	Staphylococcus aureus	TP	1
	Chlamydia trachomatis	Chlamydia trachomatis		49795	0.883956	TP		Chlamydia trachomatis	TP
	Cytomegalovirus	Cytomegalovirus		3536	0.0627707	TP		Cytomegalovirus	TP
12	Human metapneumovirus	Human metapneumovirus	134	134	1	TP	1	Human metapneumovirus	FN	0
13	Haemophilus influenzae	Haemophilus influenzae	62430	24	0.000384431	TP	1	Haemophilus influenzae	FN	0
	Human metapneumovirus	Human metapneumovirus		62260	0.997277	TP		Human metapneumovirus	FN
14	Respiratory syncytial virus	Respiratory syncytial virus	56017	56017	1	TP	1	Respiratory syncytial virus	TP	1
15	Negative	Negative	0	0	0	TN	1	Negative	TN	1
16	Cytomegalovirus	Cytomegalovirus	83907	84	0.00100111	TP	1	Cytomegalovirus	TP	0.5
	Chlamydia trachomatis	Chlamydia trachomatis		82597	0.984387	TP		Chlamydia trachomatis	FN
17	Cytomegalovirus	Cytomegalovirus	66584	2115	0.0317644	TP	1	Cytomegalovirus	TP	1
	Chlamydia trachomatis	Chlamydia trachomatis		45126	0.67773	TP		Chlamydia trachomatis	TP
18	Respiratory syncytial virus	Respiratory syncytial virus	51993	48024	0.923663	TP	1	Respiratory syncytial virus	FN	0
19	Rhinovirus	Rhinovirus	48898	48479	0.991431	TP	1	Rhinovirus	FN	0
	Bordetella pertussis	Bordetella pertussis		307	0.00627838	TP		Bordetella pertussis	FN
20	Cytomegalovirus	Cytomegalovirus	14069	1747	0.124174	TP	1	Cytomegalovirus	FN	0
	Respiratory syncytial virus	Respiratory syncytial virus		12322	0.875826	TP		Respiratory syncytial virus	FN
21	Parainfluenza virus	Parainfluenza virus	60616	51754	0.853801	TP	1	Parainfluenza virus	FN	0.5
	Moraxella catarrhalis	Moraxella catarrhalis		8862	0.146199	TP		Moraxella catarrhalis	TP
22	Moraxella catarrhalis	Moraxella catarrhalis	44761	44456	0.993186	TP	1	Moraxella catarrhalis	TP	1
23	Chlamydia trachomatis	Chlamydia trachomatis	82034	57240	0.697759	TP	1	Chlamydia trachomatis	TP	1
	Cytomegalovirus	Cytomegalovirus		4201	0.0512105	TP		Cytomegalovirus	TP
24	Respiratory syncytial virus	Respiratory syncytial virus	58249	18627	0.668733	TP	1	Respiratory syncytial virus	FN	0.666667
	Cytomegalovirus	Cytomegalovirus		669	0.0114852	TP		Cytomegalovirus	TP
	Moraxella catarrhalis	Moraxella catarrhalis		38953	0.319782	TP		Moraxella catarrhalis	TP
25	Streptococcus pneumoniae	Streptococcus pneumoniae	70334	3984	0.056644	TP	1	Streptococcus pneumoniae	TP	0.666667
	Cytomegalovirus	Cytomegalovirus		7367	0.104743	TP		Cytomegalovirus	TP
	Respiratory syncytial virus	Respiratory syncytial virus		57804	0.82185	TP		Respiratory syncytial virus	FN
26	Streptococcus pneumoniae	Streptococcus pneumoniae	16	0	0	FN	0	Streptococcus pneumoniae	TP	1
	Haemophilus influenzae	Haemophilus influenzae		0	0	FN		Haemophilus influenzae	TP
27	Cytomegalovirus	Cytomegalovirus	1728	1668	0.965278	TP	1	Cytomegalovirus	TP	0.666667
	Staphylococcus aureus	Staphylococcus aureus		12	0.00694444	TP		Staphylococcus aureus	FN
	Klebsiella pneumoniae	Klebsiella pneumoniae		7	0.00405093	TP		Klebsiella pneumoniae	TP
28	Negative	Enterococcus faecalis	11535	37	0.00320763	FP	0	Negative	TN	1
29	Unidentified bacteria	-	1461	0	0	FN	0	-	FN	0
30	Negative	Negative	0	0	0	TN	1	Negative	TN	1
31	Respiratory syncytial virus	Respiratory syncytial virus	38423	32108	0.835645	TP	1	Respiratory syncytial virus	FN	0
	Cytomegalovirus	Cytomegalovirus		6301	0.000364365	TP		Cytomegalovirus	FN
32	Enterovirus group B	Enterovirus group B	6975	6106	0.875412	TP	1	Enterovirus group B	FN	0
33	Escherichia coli	Escherichia coli	266	0	0	FN	0.5	Escherichia coli	TP	0.5
	Cytomegalovirus	Cytomegalovirus		217	0.815789	TP		Cytomegalovirus	FN
34	Mycobacterium tuberculosis complex	Mycobacterium tuberculosis complex	63873	63873	1	TP	1	Mycobacterium tuberculosis complex	FN	0
35	Respiratory syncytial virus	Respiratory syncytial virus	55361	50237	0.907444	TP	1	Respiratory syncytial virus	TP	0.666667
	Chlamydia trachomatis	Chlamydia trachomatis		807	0.014577	TP		Chlamydia trachomatis	FN
	Haemophilus influenzae	Haemophilus influenzae		4317	0.0779791	TP		Haemophilus influenzae	TP
36	Cytomegalovirus	Cytomegalovirus	57004	213	0.00373658	TP	1	Cytomegalovirus	TP	0.5
	Respiratory syncytial virus	Respiratory syncytial virus		56517	0.991457	TP		Respiratory syncytial virus	FN
37	Escherichia coli	Escherichia coli	71849	15	0.000208771	TP	1	Escherichia coli	FN	0.333333
	Parainfluenza virus	Parainfluenza virus		71187	0.990786	TP		Parainfluenza virus	FN
	Haemophilus influenzae	Haemophilus influenzae		37	0.000514969	TP		Haemophilus influenzae	TP
38	Enterovirus D68	Enterovirus D68	52080	43459	0.834466	TP	1	Enterovirus D68	FN	0
	Bordetella pertussis	Bordetella pertussis		604	0.0115975	TP		Bordetella pertussis	FN
39	Haemophilus influenzae	Haemophilus influenzae	25648	6998	0.272848	TP	1	Haemophilus influenzae	FN	0
	Rhinovirus	Rhinovirus		18551	0.723292	TP		Rhinovirus	FN
40	Parainfluenza virus	Parainfluenza virus	81990	72459	0.883754	TP	1	Parainfluenza virus	FN	0
41	Respiratory syncytial virus	Respiratory syncytial virus	79056	78730	0.995876	TP	1	Respiratory syncytial virus	FN	0
42	Respiratory syncytial virus	Respiratory syncytial virus	59543	45668	0.138371	TP	1	Respiratory syncytial virus	FN	0
	Moraxella catarrhalis	Moraxella catarrhalis		8239	0.766975	TP		Moraxella catarrhalis	FN
43	Respiratory syncytial virus	Respiratory syncytial virus	24362	6547	0.268738	TP	1	Respiratory syncytial virus	TP	0.5
	Haemophilus influenzae	Haemophilus influenzae		61	0.0025039	TP		Haemophilus influenzae	FN
44	Cytomegalovirus	Cytomegalovirus	23935	1244	0.0519741	TP	1	Cytomegalovirus	TP	1
45	Adenovirus	Adenovirus	55206	50580	0.00262653	TP	0.75	Adenovirus	FN	0
	Parainfluenza virus	Parainfluenza virus		4458	0.0807521	TP		Parainfluenza virus	FN
	Mycoplasma pneumoniae	Mycoplasma pneumoniae		23	0.916205	TP		Mycoplasma pneumoniae	FN
	Unidentified bacteria	-		0	0	FN		-	FN
46	Haemophilus influenzae	Haemophilus influenzae	21627	12447	0.575531	TP	1	Haemophilus influenzae	FN	0
	Staphylococcus aureus	Staphylococcus aureus		1098	0.0507699	TP		Staphylococcus aureus	FN
	Rhinovirus	Rhinovirus		424	0.0196051	TP		Rhinovirus	FN
47	Streptococcus pneumoniae	Streptococcus pneumoniae	51900	31292	0.602929	TP	0.666667	Streptococcus pneumoniae	TP	0.666667
	Mycoplasma pneumoniae	Mycoplasma pneumoniae		0	0	FN		Mycoplasma pneumoniae	TP
	Human metapneumovirus	Human metapneumovirus		20553	0.396012	TP		Human metapneumovirus	FN
48	Parainfluenza virus	Parainfluenza virus	32052	28533	0.89021	TP	1	Parainfluenza virus	FN	0
49	Streptococcus pneumoniae	Streptococcus pneumoniae	83122	316	0.00380164	TP	1	Streptococcus pneumoniae	FN	0
	Respiratory syncytial virus	Respiratory syncytial virus		82500	0.00048122	TP		Respiratory syncytial virus	FN
50	Streptococcus pneumoniae	Streptococcus pneumoniae	39024	0	0	FN	0.5	Streptococcus pneumoniae	TP	0.5
	Haemophilus influenzae	Haemophilus influenzae		816	0.0209102	TP		Haemophilus influenzae	FN
51	Respiratory syncytial virus	Respiratory syncytial virus	58373	58373	1	TP	1	Respiratory syncytial virus	TP	1
52	Influenza B virus	Influenza B virus	57755	0	0	FN	0.666667	Influenza B virus	TP	0.666667
	Rhinovirus	Rhinovirus		52916	0.916215	TP		Rhinovirus	FN
	Haemophilus influenzae	Haemophilus influenzae		4839	0.083785	TP		Haemophilus influenzae	TP
53	Cytomegalovirus	Cytomegalovirus	61850	18191	0.294115	TP	1	Cytomegalovirus	FN	0.666667
	Haemophilus influenzae	Haemophilus influenzae		2682	0.043363	TP		Haemophilus influenzae	TP
	Streptococcus pneumoniae	Streptococcus pneumoniae		40657	0.657348	TP		Streptococcus pneumoniae	TP
54	Unidentified bacteria	-	128	0	0	FN	0	-	FN	0
55	Rhinovirus	Rhinovirus	857	174	0.203034	TP	1	Rhinovirus	TP	1
56	Respiratory syncytial virus	Respiratory syncytial virus	67567	67481	0.998727	TP	0.5	Respiratory syncytial virus	FN	0.5
	Escherichia coli	Escherichia coli		0	0	FN		Escherichia coli	TP
57	Cytomegalovirus	Cytomegalovirus	8451	0	0	FN	0.333333	Cytomegalovirus	TP	0.666667
	Haemophilus influenzae	Haemophilus influenzae		0	0	FN		Haemophilus influenzae	TP
	Rhinovirus	Rhinovirus		8451	1	TP		Rhinovirus	FN
58	Haemophilus influenzae	Haemophilus influenzae	55106	0	0	FN	0.333333	Haemophilus influenzae	TP	0.666667
	Mycoplasma pneumoniae	Mycoplasma pneumoniae		0	0	FN		Mycoplasma pneumoniae	TP
	Cytomegalovirus	Cytomegalovirus		4465	0.00114325	TP		Cytomegalovirus	FN
59	Human metapneumovirus	Human metapneumovirus	64630	64392	0.996317	TP	1	Human metapneumovirus	FN	0
60	Streptococcus pneumoniae	Streptococcus pneumoniae	38060	590	0.0155018	TP	1	Streptococcus pneumoniae	TP	0.666667
	Parainfluenza virus	Parainfluenza virus		36278	0.953179	TP		Parainfluenza virus	FN
	Moraxella catarrhalis	Moraxella catarrhalis		1156	0.0303731	TP		Moraxella catarrhalis	TP
61	Streptococcus pneumoniae	Streptococcus pneumoniae	39671	8152	0.20549	TP	1	Streptococcus pneumoniae	TP	0.666667
	Haemophilus influenzae	Haemophilus influenzae		608	0.0153261	TP		Haemophilus influenzae	TP
	Rhinovirus	Rhinovirus		30794	0.776235	TP		Rhinovirus	FN
62	Influenza B virus	Influenza B virus	45559	11645	0.255603	TP	1	Influenza B virus	FN	0.333333
	Haemophilus influenzae	Haemophilus influenzae		109	0.0023925	TP		Haemophilus influenzae	TP
	Rhinovirus	Rhinovirus		33580	0.737066	TP		Rhinovirus	FN
63	Respiratory syncytial virus	Respiratory syncytial virus	49559	49264	0.00272403	TP	1	Respiratory syncytial virus	FN	0
	Moraxella catarrhalis	Moraxella catarrhalis		135	0.994047	TP		Moraxella catarrhalis	FN
64	Haemophilus influenzae	Haemophilus influenzae	53158	0	0	FN	0.333333	Haemophilus influenzae	TP	0.666667
	Streptococcus pneumoniae	Streptococcus pneumoniae		0	0	FN		Streptococcus pneumoniae	TP
	Human metapneumovirus	Human metapneumovirus		52947	0.996031	TP		Human metapneumovirus	FN
65	Cytomegalovirus	Cytomegalovirus	24165	167	0.00691082	TP	1	Cytomegalovirus	TP	0.5
	Rhinovirus	Rhinovirus		23655	0.978895	TP		Rhinovirus	FN
66	Moraxella catarrhalis	Moraxella catarrhalis	50570	0	0	FN	0.666667	Moraxella catarrhalis	TP	0.333333
	Human metapneumovirus	Human metapneumovirus		49765	0.984081	TP		Human metapneumovirus	FN
	Rhinovirus	Rhinovirus		408	0.00806802	TP		Rhinovirus	FN
67	Enterovirus D68	Enterovirus D68	43110	43067	0.999003	TP	1	Enterovirus D68	FN	0
68	Parainfluenza virus	Parainfluenza virus	48951	48877	0.998488	TP	0.5	Parainfluenza virus	FN	0.5
	Staphylococcus aureus	Staphylococcus aureus		0	0	FN		Staphylococcus aureus	TP
69	Streptococcus pneumoniae	Streptococcus pneumoniae	35496	508	0.0143115	TP	1	Streptococcus pneumoniae	TP	1
	Moraxella catarrhalis	Moraxella catarrhalis		10580	0.298062	TP		Moraxella catarrhalis	TP
70	Haemophilus influenzae	Haemophilus influenzae	59985	59891	0.00156706	TP	0.5	Haemophilus influenzae	TP	1
	Streptococcus pneumoniae	Streptococcus pneumoniae		0	0	FN		Streptococcus pneumoniae	TP
71	Mycoplasma pneumoniae	Mycoplasma pneumoniae	72825	72675	0.99794	TP	1	Mycoplasma pneumoniae	TP	1
72	Streptococcus pneumoniae	Streptococcus pneumoniae	45963	3483	0.0757783	TP	0.75	Streptococcus pneumoniae	TP	0.75
	Haemophilus influenzae	Haemophilus influenzae		521	0.0113352	TP		Haemophilus influenzae	TP
	Mycoplasma pneumoniae	Mycoplasma pneumoniae		0	0	FN		Mycoplasma pneumoniae	TP
	Respiratory syncytial virus	Respiratory syncytial virus		41774	0.908861	TP		Respiratory syncytial virus	FN
73	Mycoplasma pneumoniae	Mycoplasma pneumoniae	56050	0	0	FN	0.666667	Mycoplasma pneumoniae	TP	1
	Haemophilus influenzae	Haemophilus influenzae		9751	0.000124888	TP		Haemophilus influenzae	TP
	Rhinovirus	Rhinovirus		45447	0.81083	TP		Rhinovirus	TP
74	Haemophilus influenzae	Haemophilus influenzae	3603	806	0.223702	TP	1	Haemophilus influenzae	FN	0
	Human metapneumovirus	Human metapneumovirus		2666	0.739939	TP		Human metapneumovirus	FN
75	Human metapneumovirus	Human metapneumovirus	49108	49044	0.998697	TP	0.5	Human metapneumovirus	FN	0
	Unidentified bacteria	-		0	0	FN		-	FN
76	Parainfluenza virus	Parainfluenza virus	50117	45408	0.90604	TP	1	Parainfluenza virus	FN	0
77	Mycoplasma pneumoniae	Mycoplasma pneumoniae	59035	50835	0.861099	TP	1	Mycoplasma pneumoniae	TP	0.666667
	Haemophilus influenzae	Haemophilus influenzae		7145	0.12103	TP		Haemophilus influenzae	TP
	Moraxella catarrhalis	Moraxella catarrhalis		1055	0.0178708	TP		Moraxella catarrhalis	FN
78	Mycoplasma pneumoniae	Mycoplasma pneumoniae	35809	0	0	FN	0.5	Mycoplasma pneumoniae	TP	0.5
	Human bocavirus virus type 1	Human bocavirus virus type 1		35794	0.999581	TP		Human bocavirus virus type 1	FN
79	Adenovirus	Adenovirus	47770	42694	0.105108	TP	0.5	Adenovirus	FN	0.5
	Haemophilus influenzae	Haemophilus influenzae		0	0	FN		Haemophilus influenzae	TP
80	Haemophilus influenzae	Haemophilus influenzae	7414	117	0.015781	TP	1	Haemophilus influenzae	FN	0
	Human metapneumovirus	Human metapneumovirus		7297	0.984219	TP		Human metapneumovirus	FN
81	Respiratory syncytial virus	Respiratory syncytial virus	39190	128	0.00326614	TP	1	Respiratory syncytial virus	FN	0
	Streptococcus pneumoniae	Streptococcus pneumoniae		39033	0.995994	TP		Streptococcus pneumoniae	FN
82	Mycoplasma pneumoniae	Mycoplasma pneumoniae	60410	60151	0.995713	TP	1	Mycoplasma pneumoniae	FN	0
83	Mycoplasma pneumoniae	Mycoplasma pneumoniae	55577	375	0.0067474	TP	1	Mycoplasma pneumoniae	FN	0
	Haemophilus influenzae	Haemophilus influenzae		9054	0.162909	TP		Haemophilus influenzae	FN
	Human metapneumovirus	Human metapneumovirus		46148	0.830343	TP		Human metapneumovirus	FN
84	Unidentified bacteria	-	21	0	0	FN	0	-	FN	0
85	Negative	Moraxella catarrhalis	498	200	0.401606	FP	0	Negative	TN	1
		Klebsiella pneumoniae		298	0.598394	FP
86	Streptococcus pneumoniae	Streptococcus pneumoniae	66613	7379	0.110774	TP	1	Streptococcus pneumoniae	FN	0
	Respiratory syncytial virus	Respiratory syncytial virus		58987	0.885518	TP		Respiratory syncytial virus	FN
87	Negative	Negative	0	0	0	TN	1	Negative	TN	1
88	Mycoplasma pneumoniae	Mycoplasma pneumoniae	67277	67277	1	TP	1	Mycoplasma pneumoniae	FN	0
89	Respiratory syncytial virus	Respiratory syncytial virus	3555	472	0.132771	TP	1	Respiratory syncytial virus	TP	1
	Streptococcus pneumoniae	Streptococcus pneumoniae		3083	0.867229	TP		Streptococcus pneumoniae	TP
90	Haemophilus influenzae	Haemophilus influenzae	7546	7530	0.99788	TP	1	Haemophilus influenzae	FN	0
91	Haemophilus influenzae	Haemophilus influenzae	64133	0	0	FN	0.5	Haemophilus influenzae	TP	0.5
	Human bocavirus virus type 1	Human bocavirus virus type 1		64120	0.999797	TP		Human bocavirus virus type 1	FN
92	Mycoplasma pneumoniae	Mycoplasma pneumoniae	55531	55401	0.997659	TP	1	Mycoplasma pneumoniae	TP	1
93	Respiratory syncytial virus	Respiratory syncytial virus	26842	12920	0.481335	TP	0.666667	Respiratory syncytial virus	FN	0.666667
	Mycoplasma pneumoniae	Mycoplasma pneumoniae		0	0	FN		Mycoplasma pneumoniae	TP
	Haemophilus influenzae	Haemophilus influenzae		13914	0.518367	TP		Haemophilus influenzae	TP
94	Respiratory syncytial virus	Respiratory syncytial virus	11408	0	0	FN	0.666667	Respiratory syncytial virus	TP	0.333333
	Streptococcus pneumoniae	Streptococcus pneumoniae		8761	0.76797	TP		Streptococcus pneumoniae	FN
	Moraxella catarrhalis	Moraxella catarrhalis		2645	0.231855	TP		Moraxella catarrhalis	FN
95	Respiratory syncytial virus	Respiratory syncytial virus	73	73	1	TP	1	Respiratory syncytial virus	FN	0
96	Mycoplasma pneumoniae	Mycoplasma pneumoniae	71347	70451	0.987442	TP	1	Mycoplasma pneumoniae	TP	1
97	Parainfluenza virus	Parainfluenza virus	61937	61863	0.998805	TP	1	Parainfluenza virus	FN	0
98	Human metapneumovirus	Human metapneumovirus	57164	55944	0.978658	TP	1	Human metapneumovirus	FN	0
	Rhinovirus	Rhinovirus		1219	0.0213246	TP		Rhinovirus	FN
99	Streptococcus pneumoniae	Streptococcus pneumoniae	49250	18339	0.372365	TP	1	Streptococcus pneumoniae	TP	0.666667
	Acinetobacter baumannii	Acinetobacter baumannii		19929	0.40465	TP		Acinetobacter baumannii	FN
	Haemophilus influenzae	Haemophilus influenzae		10982	0.222985	TP		Haemophilus influenzae	TP
100	Mycoplasma pneumoniae	Mycoplasma pneumoniae	62276	62276	1	TP	1	Mycoplasma pneumoniae	TP	1
101	Negative	Negative	0	0	0	TN	1	Mycoplasma pneumoniae	FP	0
102	Moraxella catarrhalis	Moraxella catarrhalis	54681	6091	0.111392	TP	1	Moraxella catarrhalis	FN	0
	Human coronavirus	Human coronavirus		47662	0.871637	TP		Human coronavirus	FN
103	Haemophilus influenzae	Haemophilus influenzae	53316	0	0	FN	0.5	Haemophilus influenzae	TP	0.5
	Respiratory syncytial virus	Respiratory syncytial virus		53316	1	TP		Respiratory syncytial virus	FN
104	Mycoplasma pneumoniae	Mycoplasma pneumoniae	71614	71593	0.999707	TP	1	Mycoplasma pneumoniae	TP	1
105	Mycoplasma pneumoniae	Mycoplasma pneumoniae	245	2	0.00816327	TP	1	Mycoplasma pneumoniae	TP	0.5
	Acinetobacter baumannii	Acinetobacter baumannii		188	0.767347	TP		Acinetobacter baumannii	FN
106	Human metapneumovirus	Human metapneumovirus	55701	55546	0.997217	TP	1	Human metapneumovirus	FN	0
	Moraxella catarrhalis	Moraxella catarrhalis		155	0.00278271	TP		Moraxella catarrhalis	FN
107	Rhinovirus	Rhinovirus	50119	50094	0.999501	TP	1	Rhinovirus	FN	0
108	Haemophilus influenzae	Haemophilus influenzae	3437	3436	0.999709	TP	1	Haemophilus influenzae	FN	0
109	Human metapneumovirus	Human metapneumovirus	24206	24201	0.999793	TP	1	Human metapneumovirus	FN	0
110	Streptococcus pneumoniae	Streptococcus pneumoniae	401	171	0.426434	TP	1	Streptococcus pneumoniae	FN	0
111	Mycoplasma pneumoniae	Mycoplasma pneumoniae	21630	60	0.00277393	TP	1	Mycoplasma pneumoniae	FN	0
	Streptococcus pneumoniae	Streptococcus pneumoniae		75	0.00346741	TP		Streptococcus pneumoniae	FN
	Respiratory syncytial virus	Respiratory syncytial virus		21456	0.00087841	TP		Respiratory syncytial virus	FN
112	Streptococcus pneumoniae	Streptococcus pneumoniae	47629	188	0.00394718	TP	1	Streptococcus pneumoniae	FN	0
	Respiratory syncytial virus	Respiratory syncytial virus		47441	0.996053	TP		Respiratory syncytial virus	FN
113	Mycoplasma pneumoniae	Mycoplasma pneumoniae	80	0	0	FN	0.5	Mycoplasma pneumoniae	TP	0.5
	Haemophilus influenzae	Haemophilus influenzae		42	0.525	TP		Haemophilus influenzae	FN
114	Mycoplasma pneumoniae	Mycoplasma pneumoniae	66236	66236	1	TP	1	Mycoplasma pneumoniae	TP	1
115	Mycoplasma pneumoniae	Mycoplasma pneumoniae	68865	68865	1	TP	1	Mycoplasma pneumoniae	FN	0
116	Mycoplasma pneumoniae	Mycoplasma pneumoniae	48869	48869	1	TP	1	Mycoplasma pneumoniae	FN	0
117	Haemophilus influenzae	Haemophilus influenzae	5818	11	0.00154692	TP	0.75	Haemophilus influenzae	FN	0.5
	Mycoplasma pneumoniae	Mycoplasma pneumoniae		0	0	FN		Mycoplasma pneumoniae	TP
	Parainfluenza virus	Parainfluenza virus		4797	0.131317	TP		Parainfluenza virus	FN
	Epstein-Barr virus	Epstein-Barr virus		19	0.00326573	TP		Epstein-Barr virus	TP
118	Mycobacterium tuberculosis complex	Mycobacterium tuberculosis complex	4886	4886	1	TP	1	Mycobacterium tuberculosis complex	FN	0
119	Mycoplasma pneumoniae	Mycoplasma pneumoniae	72173	0	0	FN	0.5	Mycoplasma pneumoniae	TP	0.5
	Human metapneumovirus	Human metapneumovirus		72173	1	TP		Human metapneumovirus	FN
120	Human coronavirus	Human coronavirus	48510	47896	0.987343	TP	1	Human coronavirus	FN	0
	Streptococcus pneumoniae	Streptococcus pneumoniae		614	0.0126572	TP		Streptococcus pneumoniae	FN
121	Streptococcus pneumoniae	Streptococcus pneumoniae	32766	32425	0.989593	TP	0.666667	Streptococcus pneumoniae	FN	0.333333
	Staphylococcus aureus	Staphylococcus aureus		0	0	FN		Staphylococcus aureus	TP
	Parainfluenza virus	Parainfluenza virus		9	0.00854544	TP		Parainfluenza virus	FN
122	Respiratory syncytial virus	Respiratory syncytial virus	287	4	0.00348432	TP	1	Respiratory syncytial virus	FN	0
	Haemophilus influenzae	Haemophilus influenzae		207	0.721254	TP		Haemophilus influenzae	FN
123	Respiratory syncytial virus	Respiratory syncytial virus	66092	66092	1	TP	0.5	Respiratory syncytial virus	FN	0
	Unidentified bacteria	-		0	0	FN		-	FN
124	Rhinovirus	Rhinovirus	66135	62476	0.944674	TP	1	Rhinovirus	FN	0
	Haemophilus influenzae	Haemophilus influenzae		3659	0.0553262	TP		Haemophilus influenzae	FN
125	Haemophilus influenzae	Haemophilus influenzae	4576	3787	0.827579	TP	1	Haemophilus influenzae	TP	0.5
	Rhinovirus	Rhinovirus		789	0.172421	TP		Rhinovirus	FN
126	Mycoplasma pneumoniae	Mycoplasma pneumoniae	62644	62615	0.999537	TP	1	Mycoplasma pneumoniae	TP	1
127	Haemophilus influenzae	Haemophilus influenzae	24938	281	0.0112679	TP	1	Haemophilus influenzae	FN	0
	Rhinovirus	Rhinovirus		24657	0.988732	TP		Rhinovirus	FN
128	Mycoplasma pneumoniae	Mycoplasma pneumoniae	64382	64371	0.999829	TP	1	Mycoplasma pneumoniae	FN	0
129	Mycoplasma pneumoniae	Mycoplasma pneumoniae	12923	12923	1	TP	1	Mycoplasma pneumoniae	TP	1
130	Mycoplasma pneumoniae	Mycoplasma pneumoniae	4840	0	0	FN	0.666667	Mycoplasma pneumoniae	TP	0.333333
	Streptococcus pneumoniae	Streptococcus pneumoniae		1049	0.216736	TP		Streptococcus pneumoniae	FN
	Human metapneumovirus	Human metapneumovirus		3790	0.783058	TP		Human metapneumovirus	FN
131	Streptococcus pneumoniae	Streptococcus pneumoniae	72	53	0.736111	TP	1	Streptococcus pneumoniae	FN	0
	Mycoplasma pneumoniae	Mycoplasma pneumoniae		19	0.263889	TP		Mycoplasma pneumoniae	FN
132	Negative	Negative	0	0	0	TN	1	Negative	TN	1
133	Streptococcus pneumoniae	Streptococcus pneumoniae	2884	269	0.0932732	TP	1	Streptococcus pneumoniae	FN	0
	Rhinovirus	Rhinovirus		1562	0.541609	TP		Rhinovirus	FN
134	Streptococcus pneumoniae	Streptococcus pneumoniae	19584	0	0	FN	0.5	Streptococcus pneumoniae	TP	0.5
	Rhinovirus	Rhinovirus		19584	1	TP		Rhinovirus	FN
135	Mycoplasma pneumoniae	Mycoplasma pneumoniae	79350	79350	1	TP	1	Mycoplasma pneumoniae	TP	1
136	Human metapneumovirus	Human metapneumovirus	38434	38434	1	TP	1	Human metapneumovirus	FN	0
137	Respiratory syncytial virus	Respiratory syncytial virus	60617	60617	1	TP	1	Respiratory syncytial virus	FN	0
138	Streptococcus pneumoniae	Streptococcus pneumoniae	24525	695	0.0283384	TP	1	Streptococcus pneumoniae	TP	0.5
	Parainfluenza virus	Parainfluenza virus		23830	0.971662	TP		Parainfluenza virus	FN
139	Mycoplasma pneumoniae	Mycoplasma pneumoniae	60209	60209	1	TP	1	Mycoplasma pneumoniae	TP	1
140	Respiratory syncytial virus	Respiratory syncytial virus	61543	61543	1	TP	0.5	Respiratory syncytial virus	FN	0
	Unidentified bacteria	-		0	0	FN		-	FN
141	Parainfluenza virus	Parainfluenza virus	59898	24129	0.402835	TP	1	Parainfluenza virus	FN	0.5
	Moraxella catarrhalis	Moraxella catarrhalis		35769	0.597165	TP		Moraxella catarrhalis	TP
142	Mycoplasma pneumoniae	Mycoplasma pneumoniae	75007	75007	1	TP	1	Mycoplasma pneumoniae	FN	0
143	Respiratory syncytial virus	Respiratory syncytial virus	77301	60797	0.786497	TP	1	Respiratory syncytial virus	FN	0
144	Negative	Negative	0	0	0	TN	1	Negative	TN	1
145	Mycoplasma pneumoniae	Mycoplasma pneumoniae	17998	0	0	FN	0.333333	Mycoplasma pneumoniae	TP	0.666667
	Streptococcus pneumoniae	Streptococcus pneumoniae		0	0	FN		Streptococcus pneumoniae	TP
	Human metapneumovirus	Human metapneumovirus		17998	1	TP		Human metapneumovirus	FN
146	Streptococcus pneumoniae	Streptococcus pneumoniae	11115	11115	1	TP	1	Streptococcus pneumoniae	FN	0
147	Respiratory syncytial virus	Respiratory syncytial virus	35226	283	0.000141941	TP	1	Respiratory syncytial virus	FN	0.5
	Streptococcus pneumoniae	Streptococcus pneumoniae		34938	0.991824	TP		Streptococcus pneumoniae	TP
148	Mycoplasma pneumoniae	Mycoplasma pneumoniae	88817	88817	1	TP	1	Mycoplasma pneumoniae	FN	0
149	Streptococcus pneumoniae	Streptococcus pneumoniae	61932	10902	0.334173	TP	1	Streptococcus pneumoniae	FN	0
	Adenovirus	Adenovirus		20696	0.116289	TP		Adenovirus	FN
	Moraxella catarrhalis	Moraxella catarrhalis		7202	0.0067009	TP		Moraxella catarrhalis	FN
150	Streptococcus pneumoniae	Streptococcus pneumoniae	39905	39878	0.999323	TP	1	Streptococcus pneumoniae	TP	1
151	Mycoplasma pneumoniae	Mycoplasma pneumoniae	50458	10	0.000198185	TP	1	Mycoplasma pneumoniae	FN	0
	Respiratory syncytial virus	Respiratory syncytial virus		50448	0.999802	TP		Respiratory syncytial virus	FN
152	Streptococcus pneumoniae	Streptococcus pneumoniae	22815	4753	0.208328	TP	1	Streptococcus pneumoniae	FN	0.333333
	Haemophilus influenzae	Haemophilus influenzae		12575	0.551172	TP		Haemophilus influenzae	FN
	Moraxella catarrhalis	Moraxella catarrhalis		5323	0.233311	TP		Moraxella catarrhalis	TP
153	Mycoplasma pneumoniae	Mycoplasma pneumoniae	99124	0	0	FN	0.5	Mycoplasma pneumoniae	TP	1
	Streptococcus pneumoniae	Streptococcus pneumoniae		18195	0.816442	TP		Streptococcus pneumoniae	TP
154	Negative	Epstein-Barr virus	28	25	0.892857	FP	0	Negative	TN	1
		Cytomegalovirus		3	0.107143	FP
155	Haemophilus influenzae	Haemophilus influenzae	638	637	0.998433	TP	1	Haemophilus influenzae	FN	0
156	Mycoplasma pneumoniae	Mycoplasma pneumoniae	49166	49166	1	TP	1	Mycoplasma pneumoniae	TP	1
157	Mycoplasma pneumoniae	Mycoplasma pneumoniae	65614	65614	1	TP	1	Mycoplasma pneumoniae	TP	1
158	Unidentified bacteria	-	52	0	0	FN	0	-	FN	0
159	Adenovirus	Adenovirus	72133	72133	1	TP	1	Adenovirus	FN	0
160	Mycoplasma pneumoniae	Mycoplasma pneumoniae	23	0	0	FN	0.5	Mycoplasma pneumoniae	TP	0.5
	Haemophilus influenzae	Haemophilus influenzae		16	0.695652	TP		Haemophilus influenzae	FN
161	Mycoplasma pneumoniae	Mycoplasma pneumoniae	84538	84538	1	TP	1	Mycoplasma pneumoniae	FN	0
162	Streptococcus pneumoniae	Streptococcus pneumoniae	62979	27727	0.440258	TP	1	Streptococcus pneumoniae	TP	0.5
	Acinetobacter baumannii	Acinetobacter baumannii		261	0.00414424	TP		Acinetobacter baumannii	TP
	Parainfluenza virus	Parainfluenza virus		11502	0.182632	TP		Parainfluenza virus	FN
	Moraxella catarrhalis	Moraxella catarrhalis		23096	0.366725	TP		Moraxella catarrhalis	FN
163	Respiratory syncytial virus	Respiratory syncytial virus	59371	1703	0.000741103	TP	1	Respiratory syncytial virus	FN	0
	Haemophilus influenzae	Haemophilus influenzae		57624	0.970575	TP		Haemophilus influenzae	FN
164	Unidentified bacteria	-	10	0	0	FN	0	-	FN	0
165	Mycoplasma pneumoniae	Mycoplasma pneumoniae	55196	55195	0.999982	TP	1	Mycoplasma pneumoniae	FN	0
166	Respiratory syncytial virus	Respiratory syncytial virus	44167	44005	0.996332	TP	0.5	Respiratory syncytial virus	FN	0.5
	Mycoplasma pneumoniae	Mycoplasma pneumoniae		0	0	FN		Mycoplasma pneumoniae	TP
167	Moraxella catarrhalis	Moraxella catarrhalis	43051	4307	0.100044	TP	1	Moraxella catarrhalis	FN	0
	Enterovirus D68	Enterovirus D68		38744	0.899956	TP		Enterovirus D68	FN
168	Mycoplasma pneumoniae	Mycoplasma pneumoniae	52607	52549	0.998897	TP	1	Mycoplasma pneumoniae	FN	0
169	Mycoplasma pneumoniae	Mycoplasma pneumoniae	79194	79191	0.999962	TP	1	Mycoplasma pneumoniae	TP	1
170	Haemophilus influenzae	Haemophilus influenzae	42452	38516	0.907284	TP	1	Haemophilus influenzae	TP	0.5
	Human metapneumovirus	Human metapneumovirus		3936	0.0927165	TP		Human metapneumovirus	FN
171	Mycoplasma pneumoniae	Mycoplasma pneumoniae	63485	63485	1	TP	1	Mycoplasma pneumoniae	TP	1
172	Mycoplasma pneumoniae	Mycoplasma pneumoniae	63975	19625	0.69324	TP	1	Mycoplasma pneumoniae	TP	0.5
	Adenovirus	Adenovirus		44350	0.30676	TP		Adenovirus	FN
173	Streptococcus pneumoniae	Streptococcus pneumoniae	63	53	0.84127	TP	0.5	Streptococcus pneumoniae	FN	0.5
	Mycoplasma pneumoniae	Mycoplasma pneumoniae		0	0	FN		Mycoplasma pneumoniae	TP
174	Streptococcus pneumoniae	Streptococcus pneumoniae	47550	47550	1	TP	1	Streptococcus pneumoniae	TP	1
175	Haemophilus influenzae	Haemophilus influenzae	464	464	1	TP	1	Haemophilus influenzae	FN	0
176	Mycoplasma pneumoniae	Mycoplasma pneumoniae	81154	81154	1	TP	1	Mycoplasma pneumoniae	FN	0
177	Mycoplasma pneumoniae	Mycoplasma pneumoniae	71903	71890	0.999819	TP	1	Mycoplasma pneumoniae	TP	1
178	Mycoplasma pneumoniae	Mycoplasma pneumoniae	86720	86720	1	TP	1	Mycoplasma pneumoniae	TP	1
179	Haemophilus influenzae	Haemophilus influenzae	1929	39	0.0202177	TP	1	Haemophilus influenzae	FN	0
	Human metapneumovirus	Human metapneumovirus		1865	0.966822	TP		Human metapneumovirus	FN
180	Haemophilus influenzae	Haemophilus influenzae	12638	11896	0.941288	TP	1	Haemophilus influenzae	FN	0
181	Mycoplasma pneumoniae	Mycoplasma pneumoniae	66148	66148	1	TP	1	Mycoplasma pneumoniae	FN	0
182	Mycoplasma pneumoniae	Mycoplasma pneumoniae	66254	66245	0.999864	TP	1	Mycoplasma pneumoniae	FN	0
183	Bordetella pertussis	Bordetella pertussis	76093	15990	0.210138	TP	1	Bordetella pertussis	FN	0
	Mycoplasma pneumoniae	Mycoplasma pneumoniae		60103	0.789862	TP		Mycoplasma pneumoniae	FN
184	Mycoplasma pneumoniae	Mycoplasma pneumoniae	71444	71444	1	TP	1	Mycoplasma pneumoniae	FN	0
185	Streptococcus pneumoniae	Streptococcus pneumoniae	34839	15	0.000430552	TP	1	Streptococcus pneumoniae	FN	0.333333
	Mycoplasma pneumoniae	Mycoplasma pneumoniae		135	0.00387497	TP		Mycoplasma pneumoniae	TP
	Parainfluenza virus	Parainfluenza virus		34689	0.995694	TP		Parainfluenza virus	FN
186	Mycoplasma pneumoniae	Mycoplasma pneumoniae	72877	72877	1	TP	1	Mycoplasma pneumoniae	FN	0
187	Mycoplasma pneumoniae	Mycoplasma pneumoniae	44807	44807	1	TP	1	Mycoplasma pneumoniae	TP	1
188	Mycoplasma pneumoniae	Mycoplasma pneumoniae	55064	55064	1	TP	1	Mycoplasma pneumoniae	FN	0
189	Haemophilus influenzae	Haemophilus influenzae	611	611	1	TP	1	Haemophilus influenzae	TP	1
190	Mycoplasma pneumoniae	Mycoplasma pneumoniae	76300	76300	1	TP	1	Mycoplasma pneumoniae	TP	1
191	Mycoplasma pneumoniae	Mycoplasma pneumoniae	55403	54244	0.979081	TP	1	Mycoplasma pneumoniae	FN	0
192	Mycoplasma pneumoniae	Mycoplasma pneumoniae	73306	73306	1	TP	1	Mycoplasma pneumoniae	FN	0
193	Mycoplasma pneumoniae	Mycoplasma pneumoniae	68848	68848	1	TP	1	Mycoplasma pneumoniae	FN	0
194	Mycoplasma pneumoniae	Mycoplasma pneumoniae	61919	61919	1	TP	1	Mycoplasma pneumoniae	FN	0
195	Mycoplasma pneumoniae	Mycoplasma pneumoniae	6645	0	0	FN	0.5	Mycoplasma pneumoniae	TP	1
	Haemophilus influenzae	Haemophilus influenzae		6645	1	TP		Haemophilus influenzae	TP
196	Mycoplasma pneumoniae	Mycoplasma pneumoniae	75910	75910	1	TP	1	Mycoplasma pneumoniae	FN	0
197	Adenovirus	Adenovirus	61190	52634	0.00151986	TP	1	Adenovirus	FN	0.333333
	Streptococcus pneumoniae	Streptococcus pneumoniae		8463	0.860173	TP		Streptococcus pneumoniae	FN
	Chlamydia pneumoniae	Chlamydia pneumoniae		93	0.138307	TP		Chlamydia pneumoniae	TP
198	Rhinovirus	Rhinovirus	25793	25793	1	TP	1	Rhinovirus	FN	0
199	Rhinovirus	Rhinovirus	36512	36512	1	TP	1	Rhinovirus	FN	0
200	Mycoplasma pneumoniae	Mycoplasma pneumoniae	82979	82979	1	TP	1	Mycoplasma pneumoniae	FN	0
201	Mycoplasma pneumoniae	Mycoplasma pneumoniae	86589	86589	1	TP	1	Mycoplasma pneumoniae	FN	0
202	Mycoplasma pneumoniae	Mycoplasma pneumoniae	59577	59577	1	TP	1	Mycoplasma pneumoniae	FN	0
203	Streptococcus pneumoniae	Streptococcus pneumoniae	58925	0	0	FN	0.333333	Streptococcus pneumoniae	TP	1
	Legionella pneumophila	Legionella pneumophila		0	0	FN		Legionella pneumophila	TP
	Mycoplasma pneumoniae	Mycoplasma pneumoniae		58862	0.998931	TP		Mycoplasma pneumoniae	TP
204	Streptococcus pneumoniae	Streptococcus pneumoniae	303	17	0.0561056	TP	1	Streptococcus pneumoniae	FN	0.5
	Haemophilus influenzae	Haemophilus influenzae		267	0.881188	TP		Haemophilus influenzae	TP
205	Epstein-Barr virus	Epstein-Barr virus	68107	9	0.000132145	TP	1	Epstein-Barr virus	TP	0.5
	Mycoplasma pneumoniae	Mycoplasma pneumoniae		68098	0.999868	TP		Mycoplasma pneumoniae	FN
206	Pseudomonas aeruginosa	Pseudomonas aeruginosa	61727	61621	0.998283	TP	1	Pseudomonas aeruginosa	FN	0
