# Supplementary material for: Comparative and clinical impact of targeted next-generation sequencing in pediatric pneumonia diagnosis and treatment
Source: Frontiers journal article supplement (doi:10.3389/fmicb.2025.1590792), 2025-06-25
Supplement: Table_3.xlsx [file Table_3.xlsx]

## Sheet: Sheet1
Clinical characteristics of patients and Medication adjustments after testing samples by tNGS and conventional method, respectively.
Patient ID	Clinical characteristics of patients																						Medication adjustments of tNGS			Medication adjustments of conventional method
	Age	Gender	Cough	Fever,>37.5℃	Whoop	Tri-retraction sign	Temperature,℃	Heart rate	Respiratory,rate	WBC, x109/L	Percentage of neutrophils, %	Percentage of lymphocyte, %	Lactate dehydrogenase, U/L	CRP, mg/L	PCT, ng/mL	Chest radiograph	Length of hospital stay,days	Length of the hospital stay before sampling, days	Mechanical ventilation treatment	Time of Mechanical ventilation treatment, days	SCAP	Outcome	Antibiotic adjustments	Antiviral adjustments	Exogenous steroid medications adjustments
1	M1	male	Y	N	N	Y	37.1	152	60	4.94	39.7	37	263	1	0.17	-	12	5	Y	3	Y	improve	stop antibiotics	-	-
2	M1	male	Y	N	Y	Y	36.7	162	54	9.16	16.3	67.2	306	0.3	0.16	airway stenosis	8	3	N	-	Y	improve	start antibiotics	-	-
3	M1	female	Y	N	Y	Y	36.7	145	42	16.45	33.9	42.6	259	81.7	0.2	-	25	4	Y	4	Y	improve	-	Ganciclovir	-
4	M1	male	Y	N	Y	Y	36.8	187	63	10.99	36.5	41.7	315	3.3	0.24	Atelectasis	24	2	Y	9	Y	improve	start antibiotics	Ganciclovir	-
5	M1	male	Y	N	Y	N	36.5	146	42	12.01	31.6	53	313	3.3	0.18	-	6	2	N	-	N	recover	start antibiotics	-	-
6	M1	male	Y	Y	N	Y	37.1	149	72	11.34	22.14	52.94	327	3.1	0.2	-	24	2	Y	3	Y	improve	start antibiotics	Ganciclovir	-
7	M1	male	Y	Y	N	Y	37.2	167	58	9.51	31.2	48.8	230	53.6	0.42	-	25	2	N	-	Y	improve	-	Ganciclovir	-
8	M1	male	Y	N	N	Y	36.8	147	48	10.13	30	39.5	190	8.2	0.22	-	15	10	N	-	Y	recover	start antibiotics	-	-
9	M1	male	Y	N	N	Y	36.3	163	64	5.38	43.5	47	225	1.1	0.26	Interstitial changes,emphysema	4	1	Y	3.5	N	recover	-	-	-
10	M1	female	Y	N	N	N	36.5	156	40	21.74	28	58	447	10.3	0.19	-	26	4	N	-	Y	improve	-	Ganciclovir	-
11	M1	male	Y	N	N	Y	36.8	135	52	9.86	31.6	47.2	358	1.2	0.18	-	27	3	N	-	Y	improve	-	Ganciclovir	-
12	M1	female	Y	Y	N	N	37.6	158	60	8.87	52.6	26.4	232	1	<0.1	-	16	12	N	-	Y	recover	stop antibiotics	-	-
13	M1	male	Y	N	N	N	37.2	136	38	12.73	82.8	12.3	323	11.1	0.12	-	24	11	Y	3	Y	improve	adjust antibiotics	-	-
14	M1	male	Y	N	N	N	37	144	60	9.74	19.9	64.5	312	2	0.17	-	6	2	N	-	N	recover	-	-	-
15	M1	female	Y	Y	N	N	39.4	135	32	3.19	43.6	34.8	303	1	<0.1	-	5	1	N	-	N	recover	-	-	-
16	M1	male	Y	Y	N	Y	37.1	146	56	10.3	28.1	43.3	264	5	0.28	-	26	3	N	-	Y	improve	start antibiotics	Ganciclovir	-
17	M1	female	Y	N	N	N	36.5	136	38	11.03	19.6	71.4	316	1.2	0.15	-	22	0	N	-	N	recover	start antibiotics	Ganciclovir	-
18	M2	female	Y	N	Y	Y	36.5	163	62	12.69	17.8	68.8	292	0.5	0.22	-	6	3	N	-	Y	improve	start antibiotics	Interferon	-
19	M2	male	Y	Y	N	Y	36.1	134	36	10.27	24.1	59.7	243	2.4	<0.1	-	7	4	N	-	Y	improve	-	-	-
20	M2	male	Y	Y	Y	Y	37.4	170	62	19.52	50.4	42	423	31.9	4.27	-	29	5	N	-	Y	improve	-	Ganciclovir	-
21	M2	male	Y	Y	Y	N	37.8	143	50	10.45	23.9	62.5	290	4.9	<0.1	Atelectasis	10	2	N	-	Y	improve	-	-	-
22	M2	female	Y	Y	N	N	36.7	142	38	10.88	10.8	80	303	1	0.24	-	4	1	N	-	N	recover	-	-	-
23	M2	male	Y	N	N	N	36.4	138	36	6.69	27.6	61.7	308	3.3	<0.1	-	26	2	N	-	Y	improve	stop antibiotics	Ganciclovir	-
24	M2	male	Y	N	Y	N	36.9	149	44	6.43	11.6	79.3	296	1.2	<0.1	-	27	5	N	-	N	recover	start antibiotics	Ganciclovir	-
25	M2	male	Y	Y	N	Y	36.9	153	65	23.29	42.5	48.4	290	40.9	0.86	-	9	0	Y	3	Y	improve	start antibiotics	Ganciclovir	-
26	M2	male	Y	N	Y	Y	36.7	146	60	13.4	18.4	65.9	213	21	<0.1	-	9	6	N	-	Y	improve	-	-	-
27	M3	male	Y	N	N	Y	36.8	168	52	16.9	23.6	68.9	327	7.8	<0.1	-	16	13	N	-	Y	recover	-	-	-
28	M3	male	Y	N	N	N	36.4	142	42	14.84	22.4	70	257	0.3	<0.1	-	3	1	N	-	N	recover	none	-	-
29	M3	male	Y	N	N	Y	36.2	163	62	15.56	17.1	76.3	328	1.4	0.11	-	10	2	Y	3	Y	improve	none	-	-
30	M3	female	Y	N	N	N	36.6	131	36	8.23	19.7	73	316	0.5	<0.1	-	6	2	N	-	N	recover	-	-	-
31	M3	male	Y	Y	N	Y	37.8	146	54	6.57	19	55.9	186	1.7	0.14	-	16	3	N	-	N	improve	-	Ganciclovir	-
32	M3	male	Y	N	Y	Y	36.6	126	37	10.68	30.4	55.8	235	0.6	<0.1	-	11	5	N	-	Y	improve	-	-	-
33	M3	male	Y	N	Y	Y	36	141	52	7.56	33.2	49.7	239	1.8	<0.1	emphysema	24	2	N	-	Y	improve	-	Ganciclovir	-
34	M3	female	Y	N	Y	N	36.8	166	46	11.58	47	37.1	299	17.6	0.11	airway stenosis,emphysema	1	1	N	-	N	recover	antituberculosis drugs	-	-
35	M3	male	Y	Y	N	N	39.5	207	62	12.74	67.1	24.1	353	11.6	0.45	-	8	1	N	-	N	recover	adjust antibiotics	-	-
36	M4	male	Y	Y	N	N	36.3	125	45	15.68	68	23.5	247	16.6	<0.1	-	7	3	N	-	N	referral	-	Ganciclovir	-
37	M4	male	Y	N	Y	Y	37.3	182	52	5.82	16.6	67.7	266	3.1	0.16	airway stenosis	10	3	N	-	Y	recover	-	-	-
38	M4	female	Y	N	N	Y	36.5	146	41	12.22	40.5	49.1	336	5.2	<0.1	-	7	3	N	-	Y	improve	stop antibiotics	-	-
39	M4	male	Y	Y	N	N	36.6	166	60	26.15	83.6	14.3	330	52.7	0.7	-	8	2	N	-	Y	improve	-	-	-
40	M4	female	Y	N	Y	Y	37.4	140	70	12.79	36.2	53.2	276	33.5	0.2	-	12	1	Y	4	Y	recover	-	-	-
41	M4	male	Y	Y	Y	Y	36.5	152	42	12.62	26.9	63.3	323	0.5	<0.1	-	8	4	N	-	Y	recover	stop antibiotics	-	Methylprednisolone
42	M5	female	Y	Y	N	N	38.3	158	32	12.12	35.2	58.5	243	9.4	<0.1	-	2	1	N	-	N	recover	-	-	-
43	M5	female	Y	Y	N	N	37.7	162	45	8.23	24.2	67.2	279	0	0.34	-	9	6	N	-	N	referral	-	Ganciclovir	-
44	M5	male	Y	Y	Y	N	36.9	145	40	15.75	22.6	66	265	1.7	<0.1	-	27	15	N	-	N	recover	stop antibiotics	Ganciclovir	-
45	M5	male	Y	Y	N	N	36.5	146	50	14.48	68.6	20	245	106	<0.1	-	21	16	N	-	N	recover	-	-	-
46	M6	male	Y	N	Y	N	36.4	151	44	10.53	18.9	74.6	282	0.6	<0.1	-	12	7	N	-	N	referral	start antibiotics	Ganciclovir	-
47	M6	female	Y	Y	Y	N	37.8	148	60	20.78	31.1	59.5	368	16.3	5.38	-	8	1	N	-	Y	improve	-	-	-
48	M6	male	Y	Y	N	N	37.9	160	45	11.49	36.3	46.6	322	2.3	0.22	airway stenosis,emphysema	9	4	N	-	Y	improve	-	-	-
49	M6	male	Y	Y	Y	N	39	161	45	5.14	41	51.4	377	4	0.33	-	8	5	N	-	N	recover	-	-	-
50	M6	male	Y	Y	Y	Y	37.5	166	62	14.65	58	36.7	555	0.3	0.31	-	8	1	Y	3.5	Y	improve	-	-	-
51	M6	male	Y	Y	Y	N	36.7	125	56	9.79	18.2	65.8	296	0.9	0.14	-	7	4	N	-	Y	improve	-	Interferon	-
52	M7	female	Y	Y	Y	N	38.9	145	40	7.06	37.3	47.6	300	78.6	<0.1	-	9	2	Y	5	N	recover	-	Oseltamivir	Methylprednisolone
53	M7	male	Y	N	Y	Y	37	145	50	7.78	38.1	53.5	235	1.5	<0.1	airway stenosis	14	10	N	-	N	recover	start antibiotics	Ganciclovir	-
54	M7	male	Y	Y	Y	Y	38	150	60	17.36	48.9	39.3	227	117.5	11.08	-	26	13	Y	8	Y	improve	-	-	-
55	M7	male	Y	N	Y	N	37	148	46	12.96	31.5	61.2	231	0.4	<0.1	-	7	4	N	-	N	recover	-	-	-
56	M7	male	Y	Y	Y	N	37.4	165	56	7.05	52.6	37.7	251	3.1	0.13	-	7	3	N	-	Y	improve	-	-	-
57	M7	male	Y	Y	N	N	38.5	156	42	11	36.3	42.3	293	16	<0.1	-	13	10	N	-	N	recover	-	-	-
58	M8	male	Y	N	Y	N	36.5	130	31	11.78	37.9	47.4	346	21.7	0.11	-	13	7	N	-	N	recover	stop antibiotics	-	-
59	M8	female	Y	Y	Y	N	37	128	36	10.24	70.1	25.3	256	2.8	0.15	-	4	1	N	-	N	recover	-	-	-
60	M8	male	Y	Y	Y	N	37.1	132	31	14.89	30.5	55.9	324	37.4	0.12	airway stenosis	11	3	N	-	N	improve	-	-	-
61	M8	female	Y	Y	Y	N	36.1	134	35	12.58	14.9	75.3	374	5.9	<0.1	-	5	3	N	-	N	recover	-	-	-
62	M8	male	Y	Y	Y	N	36.8	161	60	14.39	56.7	34.5	214	78.8	1.37	-	8	3	N	-	N	recover	-	Oseltamivir	-
63	M8	female	Y	Y	Y	Y	37.4	145	55	12.68	19.9	68.4	355	0.4	0.28	Atelectasis	9	3	N	-	Y	improve	-	-	-
64	M8	male	Y	Y	N	N	37.4	126	34	7.45	40.2	39.5	342	35.3	0.44	-	11	8	N	-	N	recover	-	-	-
65	M8	male	Y	N	Y	N	36.8	147	48	12.1	16	76.9	224	0.5	0.14	airway stenosis	5	2	N	-	N	recover	stop antibiotics	-	Methylprednisolone
66	M8	female	Y	Y	Y	N	36.8	139	36	7.9	27.9	59.2	249	5.7	<0.1	airway stenosis	14	10	N	-	N	recover	-	-	-
67	M8	female	Y	Y	N	N	37.9	136	34	9.44	52.1	31.9	350	2.9	0.12	-	14	8	N	-	N	recover	-	-	-
68	M9	male	Y	Y	Y	N	37.7	140	34	15.68	53.2	37.6	214	27.2	0.44	-	15	7	N	-	Y	improve	stop antibiotics	-	-
69	M9	female	Y	N	N	Y	36.8	136	34	11.27	40.8	46.1	261	3.3	<0.1	-	14	2	N	-	Y	recover	start antibiotics	-	-
70	M9	female	Y	Y	Y	N	36.2	132	34	20.59	32.1	57.7	248	3.6	<0.1	-	10	2	N	-	N	improve	-	-	-
71	M9	male	Y	Y	Y	Y	37.5	155	35	9.76	46	38.2	211	26.2	0.17	-	10	2	N	-	N	improve	-	-	Immunoglobulin,Methylprednisolone
72	M9	male	Y	Y	N	N	38.1	152	68	11.32	48.1	43.9	317	39	0.28	-	6	2	N	-	N	recover	-	-	-
73	M10	male	Y	Y	N	N	36.8	130	36	5.72	29.7	62.8	408	38.6	0.31	-	7	1	N	-	Y	improve	adjust antibiotics	-	-
74	M10	female	Y	Y	N	Y	38.5	162	66	12.18	50.6	33.4	408	82.2	1.17	-	8	0	Y	5	Y	improve	-	-	-
75	M11	female	Y	Y	N	N	39.1	139	43	1.94	14	71.1	507	7.3	1.16	-	9	3	N	-	Y	improve	stop antibiotics	-	-
76	M11	male	Y	Y	Y	N	36.5	134	42	8.83	21.2	71.6	343	1.2	<0.1	-	5	1	N	-	N	recover	-	-	-
77	M11	male	Y	Y	N	N	37.8	130	36	12.26	35	52.6	227	63.5	<0.1	-	5	1	N	-	N	recover	-	-	-
78	Y1	male	Y	N	Y	N	36.8	154	58	8.5	55.7	35.6	322	7	0.22	-	5	1	N	-	Y	improve	-	-	-
79	Y1	male	Y	Y	N	N	36.9	120	30	12.71	46.4	39.5	244	26.2	0.4	-	6	5	N	-	N	recover	-	-	-
80	Y1	male	Y	Y	N	N	38.4	146	39	11.95	34	58.8	297	9.3	<0.1	-	11	4	N	-	N	improve	-	-	-
81	Y1	male	Y	N	N	N	38.4	150	40	44.5	73.6	22.4	354	140.5	15.12	-	6	1	N	-	N	recover	-	-	-
82	Y1	male	Y	Y	Y	N	37.4	145	40	12.57	46.2	42	285	3	0.21	-	11	8	N	-	N	recover	-	-	-
83	Y1	male	Y	Y	N	N	36.6	148	58	3.41	58.1	37.8	589	31.2	0.93	-	9	2	Y	2.5	Y	improve	-	-	-
84	Y1	male	Y	N	N	N	39.2	156	43	23.25	65.7	26.2	253	65.2	0.36	airway stenosis,emphysema	15	3	N	-	N	improve	-	-	-
85	Y1	male	Y	N	Y	N	36.9	118	29	17.56	12.8	77.1	0.3	320	0.11	-	3	4	N	-	N	recover	none	-	-
86	Y1	female	Y	Y	N	N	38.7	161	60	5.87	44.8	46.3	432	9.1	0.13	-	5	3	N	-	Y	improve	-	-	-
87	Y1	male	Y	N	Y	N	36.5	142	38	10	33.5	58.6	317	0.5	0.13	airway stenosis	3	2	N	-	N	recover	-	-	-
88	Y1	male	Y	N	Y	N	36.8	124	30	11.1	56.8	33.4	316	10.2	0.14	-	10	4	N	-	N	improve	-	-	-
89	Y1	male	Y	Y	Y	Y	37.7	132	60	9.51	41.8	49.9	420	3.1	0.11	Interstitial changes,emphysema	6	3	N	-	N	recover	start antibiotics	-	-
90	Y1	male	Y	Y	N	N	37.3	127	36	6.77	34.3	44.5	324	79.8	0.29	-	4	1	N	-	N	recover	stop antibiotics	-	-
91	Y1	female	Y	N	Y	Y	36.6	173	61	9.58	69.6	23.4	330	1.8	0.14	airway stenosis	8	2	Y	3	Y	improve	-	-	-
92	Y1	male	Y	Y	N	N	36.4	142	36	9.58	43.9	46	321	5.7	<0.1	-	5	2	N	-	N	recover	-	-	-
93	Y1	female	Y	Y	Y	N	36.4	118	50	13.63	47.5	46.5	451	1.1	0.19	-	5	1	N	-	N	recover	start antibiotics	-	-
94	Y1	female	Y	N	Y	N	36.5	125	32	9.33	37.6	52.1	339	1.4	0.13	airway stenosis	9	5	N	-	N	recover	-	-	-
95	Y1	male	Y	Y	N	N	38.2	140	35	9.63	22.8	59.9		17.64	0.37	-	8	4	N	-	N	recover	stop antibiotics	-	-
96	Y1	female	Y	Y	N	N	36.8	124	28	13.79	21.1	73	312	1	0.1	-	5	4	N	-	Y	improve	-	-	-
97	Y1	male	Y	Y	N	N	38.6	154	40	5.86	69.6	19.5	300	9.2	0.1	-	5	1	N	-	N	recover	-	Oseltamivir	-
98	Y1	female	Y	Y	N	Y	37.2	136	38	5.65	28.7	59.1	331	1.6	0.14	-	9	3	N	-	Y	improve	-	-	-
99	Y1	male	Y	N	N	N	36.9	123	30	7.12	25.2	63.1	264	1	0.12	airway stenosis	9	3	N	-	N	recover	-	-	-
100	Y1	male	Y	Y	N	N	36.8	144	50	12.56	41.9	41.6	287	7.8	0.14	emphysema	6	3	N	-	Y	improve	-	-	-
101	Y1	male	Y	N	Y	N	36.8	130	36	13.21	30.5	59.1	245	0.5	0.41	emphysema	3	2	N	-	N	recover	-	-	-
102	Y1	female	Y	Y	N	N	36.8	118	32	8.58	49.5	42.4	284	2.7	0.11	airway stenosis	6	2	N	-	N	recover	start antibiotics	-	-
103	Y2	male	Y	Y	Y	Y	38.7	121	34	6.02	46	45.3	369	17.5	0.59	-	7	4	N	-	N	recover	-	-	-
104	Y2	male	Y	Y	Y	N	37.2	147	56	8.72	57.6	34.1	244	0.3	0.1	-	8	1	Y	4	Y	improve	-	-	-
105	Y2	female	Y	Y	N	N	36.4	121	32	7.04	11.2	81.5	275	0.9	1.04	-	7	5	N	-	N	recover	-	-	-
106	Y2	male	Y	Y	N	N	38.8	121	36	6.85	59.6	28.6	493	2.9	0.85	-	7	3	N	-	N	recover	-	-	-
107	Y2	male	Y	N	Y	Y	38.5	136	42	15.63	76.2	15.6	299	7.5	0.17	-	4	2	N	-	Y	improve	stop antibiotics	-	-
108	Y2	male	Y	Y	Y	N	39.8	138	36	7.82	49.4	24.2	352	221.2	0.89	-	7	3	N	-	N	recover	-	-	-
109	Y2	male	Y	Y	Y	Y	37.2	118	42	5.13	16	75.2	509	2.3	0.34	-	7	3	N	-	Y	improve	stop antibiotics	-	-
110	Y2	male	Y	Y	N	N	38.4	142	36	27.16	63.4	27.4	258	55.51	0.35	-	6	2	N	-	Y	improve	stop antibiotics	-	-
111	Y2	female	Y	Y	Y	N	36.8	122	30	20.2	66	22.8	230	4.6	0.19	airway stenosis	6	3	N	-	N	recover	adjust antibiotics	-	-
112	Y2	female	Y	Y	Y	N	38.7	144	60	6.9	70.6	23.9	274	4.1	<0.1	-	7	5	N	-	Y	recover	-	-	-
113	Y2	male	Y	Y	N	N	37	115	27	13.32	48.9	41.1	260	37.27	0.15	-	4	2	N	-	N	recover	-	-	-
114	Y2	male	Y	Y	Y	N	38.4	134	35	15.81	60.2	32.1	285	10.9	0.1	-	8	5	N	-	Y	improve	-	-	-
115	Y2	female	Y	Y	Y	Y	37.9	125	28	10.04	41.2	54.3	317	12.4	0.23	-	14	5	N	-	Y	improve	-	-	Methylprednisolone
116	Y2	female	Y	Y	N	N	36.6	115	36	8.03	52.1	38	387	9.8	0.42	airway stenosis	5	2	N	-	N	recover	-	-	-
117	Y2	male	Y	Y	Y	Y	37.2	130	46	18.34	68.1	22.6	324	30.7	0.21	-	7	4	N	-	Y	improve	-	-	-
118	Y2	female	Y	Y	N	N	36.8	118	24	12.81	46	44.9	232	13.3	0.15	-	5	3	N	-	N	recover	antituberculosis drugs	-	-
119	Y2	male	Y	Y	Y	N	37.7	120	30	2.46	30.1	54.1	187	18.6	0.59	-	7	5	N	-	N	recover	-	-	-
120	Y2	male	Y	Y	N	N	37.9	120	28	24.25	79	14.4	338	248.6	1.05	-	7	0	N	-	N	recover	-	-	-
121	Y2	male	Y	Y	N	N	37.2	122	29	11.16	70.1	23.9	207	208.7	21.32	Pleural effusion	11	0	N	-	Y	improve	-	-	-
122	Y3	male	Y	Y	Y	N	36.6	108	28	11.74	65.8	25.4	379	46.3	1.09	-	6	4	N	-	Y	improve	stop antibiotics	-	-
123	Y3	female	Y	Y	Y	Y	39.1	156	60	9.25	38.4	54.6	378	2	0.53	-	8	3	N	-	Y	improve	stop antibiotics	-	-
124	Y3	male	Y	Y	N	N	38.6	135	37	5.09	3.9	44.8	195	42.4	0.37	Atelectasis	6	3	N	-	N	recover	-	-	-
125	Y3	male	Y	Y	N	N	38.6	135	37	5.09	3.9	44.8	195	42.4	0.37	Atelectasis	1	0	N	-	N	recover	-	-	-
126	Y3	female	Y	Y	N	Y	37.2	108	26	6.06	68.4	22.3	352	22.3	<0.1	-	8	3	N	-	Y	improve	-	-	-
127	Y3	female	Y	Y	N	Y	38.4	153	60	12.84	77.3	12.5	416	49.3	0.49	-	11	4	N	-	Y	improve	-	-	-
128	Y3	male	Y	Y	N	Y	39.1	135	34	2.77	45.2	48.7	316	6.1	0.73	-	11	0	N	-	Y	improve	adjust antibiotics	-	-
129	Y3	male	Y	Y	N	N	38.6	118	36	5.15	35.3	10.8	300	29.1	2.56	Pleural effusion	6	1	N	-	Y	improve	-	-	-
130	Y3	female	Y	Y	N	N	39.1	102	30	13.32	70	23.9	308	75.1	2.9	-	6	4	N	-	Y	improve	-	-	-
131	Y3	female	Y	Y	N	N	38	148	42	21.76	83.9	9.9	235	76.4	1.31	-	6	2	N	-	N	recover	-	-	-
132	Y3	female	Y	N	Y	N	36.4	110	32	10.79	49	42.1	280	0.6	<0.1	airway stenosis	8	4	N	-	N	recover	stop antibiotics	-	-
133	Y3	male	Y	Y	N	N	36.6	120	29	21.34	67.6	20.3	311	228.7	6.48	-	7	4	N	-	N	recover	-	-	-
134	Y3	male	Y	Y	N	N	36.6	108	28	14.73	40.3	52.7			0.93	-	7	1	N	-	N	recover	-	-	-
135	Y3	female	Y	Y	Y	Y	37.6	160	42	17.04	61.5	25.8	391	34.7	0.41	-	11	0	Y	7	Y	improve	-	-	-
136	Y3	male	Y	Y	Y	Y	36	102	22	4.27	30.9	60.9	379	7.6	0.22	-	7	3	N	-	Y	improve	stop antibiotics	-	Methylprednisolone
137	Y3	male	Y	Y	Y	Y	38.9	161	50	8.36	63.4	24.5	310	2.6	0.22	-	5	1	N	-	N	recover	-	-	-
138	Y3	male	Y	Y	N	N	37.1	112	32	11.84	49.7	29.7	257	50.2	0.6	-	8	5	N	-	N	recover	-	-	-
139	Y3	male	Y	Y	N	N	37.5	136	36	8.38	55	33.1	422	9.1	0.28	-	5	2	N	-	N	recover	-	-	-
140	Y3	female	Y	Y	N	Y	37.5	120	28	2.71	40.6	55.7	672	33.2	0.93	airway stenosis	7	2	N	-	Y	improve	-	-	-
141	Y3	male	Y	Y	N	N	37.1	120	32	5.69	67.8	26.7	217	5.8	<0.1	airway stenosis	7	2	N	-	N	recover	start antibiotics	-	-
142	Y3	male	Y	Y	N	N	37.8	120	42	6.39	49.5	40.1	310	10.5	0.17	airway stenosis	10	3	Y	4	Y	improve	-	-	-
143	Y3	female	Y	Y	Y	N	36.5	102	40	7.52	34.7	57.3	255	0.8	<0.1	airway stenosis	8	2	N	-	N	recover	-	-	-
144	Y3	male	Y	N	Y	N	36.8	102	27	8.84	33.3	58.9	278	1.2	<0.1	-	4	2	N	-	N	recover	adjust antibiotics	-	-
145	Y3	female	Y	Y	N	N	39	124	30	5.05	52.6	42.6	322	5.2	<0.1	-	6	3	N	-	N	recover	-	-	-
146	Y3	male	Y	Y	N	Y	37.6	112	32	13.9	48.7	41.8	234	137.94	24.72	-	6	2	N	-	Y	improve	stop antibiotics	-	-
147	Y3	male	Y	Y	N	N	38.4	138	44	9.17	70.7	14.7	260	29.6	0.26	-	7	2	N	-	N	recover	-	-	-
148	Y3	male	Y	Y	N	N	37.1	132	31	6.33	58.4	34	416	8	0.22	-	9	6	N	-	Y	improve	stop antibiotics	-	-
149	Y3	male	Y	N	N	N	36.9	119	32	11.48	47.5	40.6	301	0.7	0.22	-	3	1	N	-	N	recover	start antibiotics	-	-
150	Y4	female	Y	Y	N	N	36.3	143	32	13.01	66.2	24.6	273	15.2	<0.1	-	6	2	N	-	N	recover	start antibiotics	-	-
151	Y4	female	Y	Y	Y	Y	38.8	133	43	4.74	73.2	24.1	892	27.6	0.85	airway stenosis	9	2	Y	5	Y	improve	-	-	-
152	Y4	male	Y	Y	N	N	37.9	142	37	19.62	90.1	7.4	416	100.8	36.8	-	12	2	N	-	N	recover	stop antibiotics	-	-
153	Y4	female	Y	Y	N	N	36.3	102	27	14.07	71.6	21.2	222	23.89	0.39	emphysema	6	1	N	-	N	recover	-	-	-
154	Y4	female	Y	N	Y	N	36.6	123	32	13.48	40.4	51.5	246	0.8	<0.1	emphysema	11	1	N	-	N	improve	-	-	-
155	Y4	male	Y	N	N	N	36.5	97	28	12.86	52.2	35.4	240	7.3	0.13	-	3	1	N	-	N	recover	-	-	-
156	Y4	female	Y	N	N	N	36.6	115	26	12.13	48.1	41.5	287	20	0.16	-	4	2	N	-	N	recover	-	-	-
157	Y4	male	Y	Y	N	Y	36.8	135	42	2.81	70.1	26	484	60	0.47	-	4	1	N	-	N	recover	-	-	Methylprednisolone
158	Y4	female	Y	Y	Y	Y	36.5	133	36	14.97	76.3	17.8	237	12.7	<0.1	-	9	5	N	-	Y	improve	-	-	-
159	Y4	female	Y	Y	N	Y	37	116	26	3.16	49.7	42.1	248	24.08	0.59	-	8	1	N	-	Y	improve	stop antibiotics	-	-
160	Y4	female	Y	N	N	N	36.2	95	22	7.98	38	51.4	235	6.7	0.1	-	11	7	N	-	Y	recover	-	-	-
161	Y4	male	Y	Y	N	N	38	118	29	4.47	50.4	44.7	319	8.6	0.27	-	12	7	N	-	N	recover	-	-	-
162	Y4	female	Y	Y	N	Y	37	116	26	3.16	49.7	42.1	248	24.08	0.59	-	8	1	N	-	Y	improve	stop antibiotics	-	-
163	Y4	female	Y	Y	Y	N	36.3	116	30	9.18	67.04	23.34	432	132.9	19.42	airway stenosis	8	1	Y	3	Y	improve	-	-	-
164	Y4	female	Y	N	N	N	36.6	112	32	7.93	37.1	56	176	0.58	<0.1	-	5	1	N	-	N	recover	-	-	-
165	Y5	male	Y	Y	N	N	37.7	125	28	7.49	52.4	40.7	243	11.5	0.16	-	7	3	N	-	N	recover	-	-	-
166	Y5	male	Y	Y	N	Y	38.8	136	28	8.08	48.3	38.5	423	44.1	5.25	-	7	0	Y	2.5	Y	improve	-	-	-
167	Y5	female	Y	Y	Y	Y	37.1	144	42	12.15	82.3	12.9	279	4.5	0.17	-	7	1	N	-	N	recover	-	-	Methylprednisolone
168	Y5	female	Y	Y	N	N	37.9	130	50	2.98	37.7	55	285	0	0.56	airway stenosis	10	2	N	-	N	recover	-	-	Methylprednisolone
169	Y5	male	Y	Y	N	N	38.8	127	38	7.1	52.1	34.6	266	22.5	0.34	-	5	2	N	-	Y	improve	-	-	-
170	Y5	female	Y	Y	N	N	38.4	147	56	8.82	85.3	10.7	496	42	6.78	-	8	0	Y	4	Y	improve	stop antibiotics	-	-
171	Y5	male	Y	Y	N	N	37.2	138	32	6.57	62.9	27.9	304	14.6	0.23	-	8	3	N	-	N	recover	-	-	-
172	Y5	male	Y	Y	N	N	38.4	138	34	4.27	65.8	30.9	486	10.1	0.43	-	7	3	N	-	Y	improve	-	-	-
173	Y5	female	Y	Y	Y	N	36.5	100	42	7.38	66.9	24.5	330	9.09	0.2	emphysema	8	3	N	-	N	recover	start antibiotics	-	-
174	Y5	female	Y	Y	N	N	36.5	130	31	8.99	66.2	26.8	300	97.2	<0.1	-	13	1	N	-	N	recover	-	-	-
175	Y5	female	Y	N	Y	N	36.5	135	30	8.38	62.5	29.7	260	4	0.18	airway stenosis	5	1	N	-	N	recover	-	-	-
176	Y5	male	Y	Y	N	N	38.1	122	28	4.26	60.8	25.6	607	9.8	0.3	Pleural effusion	10	2	N	-	Y	improve	-	Oseltamivir	-
177	Y5	female	Y	Y	N	N	38.4	123	30	7.99	74.2	14.5	350	81.4	0.57	Atelectasis	5	2	N	-	N	recover	-	-	-
178	Y5	female	Y	Y	Y	N	36.6	134	43	5.62	58.5	35.9	375	3.4	0.73	-	7	2	N	-	Y	improve	-	-	Methylprednisolone
179	Y5	male	Y	Y	N	N	36.6	138	37	5.51	39.9	50.3	260	5.8	0.36	-	9	3	N	-	N	recover	-	-	-
180	Y5	male	Y	Y	N	N	36.6	146	32	11.62	65.4	24.2	201	50	0.17	-	6	3	N	-	N	recover	-	-	-
181	Y6	male	Y	Y	N	N	38	108	28	5.97	53.4	29.6	265	18.3	0.29	Pleural effusion	7	5	N	-	N	recover	-	-	-
182	Y6	female	Y	Y	N	N	38.9	120	28	10.06	69	18.5	300	144.39	<0.1	emphysema	5	1	N	-	N	recover	-	-	-
183	Y6	female	Y	Y	N	N	36.6	105	25	8.66	66.2	26.4	250	50.6	0.22	-	6	2	N	-	N	recover	start antibiotics	-	Methylprednisolone
184	Y6	female	Y	Y	N	N	36.6	98	30	7.69	63.8	23.4	283	11.7	<0.1	-	10	6	N	-	N	recover	start antibiotics	-	-
185	Y7	male	Y	Y	N	N	38.5	88	23	12.1	72.74	17.64	177	38.6	0.34	Pleural effusion	8	2	N	-	Y	improve	-	-	-
186	Y7	female	Y	Y	N	N	37.2	92	26	15.56	84.6	8.9	537	27.7	0.15	-	10	4	N	-	N	improve	stop antibiotics	-	-
187	Y7	male	Y	Y	N	Y	36.8	102	26	9.35	42	44.9	252	5.9	0.16	-	5	1	N	-	Y	improve	-	-	-
188	Y7	male	Y	Y	N	N	38.2	105	22	6.58	47.3	37.8	272	37.4	0.36	-	11	5	N	-	N	recover	-	-	-
189	Y7	female	Y	N	N	N	36.1	105	27	16.77	66.6	26.5	273	5.1	0.1	-	9	1	N	-	N	recover	-	-	-
190	Y7	male	Y	Y	N	N	37	115	42	6.24	43.3	44.4	270	14.3	<0.1	-	5	2	N	-	Y	improve	-	-	-
191	Y7	male	Y	Y	N	N	38.7	130	40	5.01	64	23.6	290	7.9	0.13	-	4	2	N	-	N	recover	-	-	-
192	Y8	male	Y	Y	N	N	37.1	104	30	5.92	56.5	33.4	271	15.4	0.29	-	8	1	N	-	N	recover	-	-	Methylprednisolone
193	Y8	male	Y	Y	N	N	39.3	130	30	5.49	72.1	18.6	242	4.5	0.12	Atelectasis	6	1	N	-	N	recover	-	-	Methylprednisolone
194	Y8	female	Y	Y	N	N	37	88	20	9.56	78.6	16.6	228	24.4	0.25	-	8	2	N	-	N	recover	adjust antibiotics	-	-
195	Y8	male	Y	N	N	N	36.8	101	24	5.15	31.7	56.5	218	0.7	0.12	emphysema	4	1	N	-	N	recover	start antibiotics	-	-
196	Y8	male	Y	Y	N	N	39.1	126	26	1.76	31.3	59.1	286	8.6	0.14	-	7	2	N	-	N	recover	-	-	-
197	Y9	male	Y	Y	N	N	38.9	140	32	10.8	84.3	13.2	216	7.2	0.5	Atelectasis,emphysema	6	2	N	-	N	recover	-	-	-
198	Y9	male	Y	N	N	Y	37.4	118	50	6.37	71.2	16.3	212	3.6	0.16	-	5	1	Y	3	Y	improve	-	-	-
199	Y9	female	Y	Y	Y	N	37.2	115	24	6.58	70.9	18.2	244	50.3	0.1	-	5	1	N	-	N	recover	-	-	-
200	Y9	female	Y	Y	N	N	38.7	98	30	8.26	65.4	26.4	278	32	0.2	-	7	2	N	-	N	recover	-	-	-
201	Y9	female	Y	Y	N	N	37.8	106	28	7.09	70.3	19.3	216	19.7	0.25	-	4	1	N	-	N	recover	start antibiotics	-	-
202	Y10	female	Y	Y	N	N	37.9	92	28	5.77	59.8	34.8	265	28.6	0.36	-	6	2	N	-	N	recover	-	-	-
203	Y10	male	Y	Y	N	N	38.8	122	27	5.63	62.9	24.7	268	64.1	0.62	Atelectasis	11	2	N	-	N	recover	-	-	-
204	Y10	male	Y	Y	N	N	37.2	106	35	12.1	78.2	11.9	188	20.2	<0.1	Pleural effusion	8	1	N	-	Y	improve	start antibiotics	-	-
205	Y13	male	Y	Y	N	N	36.7	93	36	6.81	60.1	27.9	278	22.8	<0.1	-	5	1	N	-	N	recover	adjust antibiotics	-	-
206	Y14	female	Y	Y	N	N	38.4	92	26	15.83	76	17.7	241	88.2		-	7	0	N	-	N	recover	-	-	-
Abbreviations: Y, Yes; N, No; WBC, White blood cell count; CRP, C-reactive protein; PCT, Procalcitonin; SCAP, Severe community-acquired pneumonia
